# Supplementary material
Source: publisher site journal article supplement (doi:10.3762/bjoc.2.5)

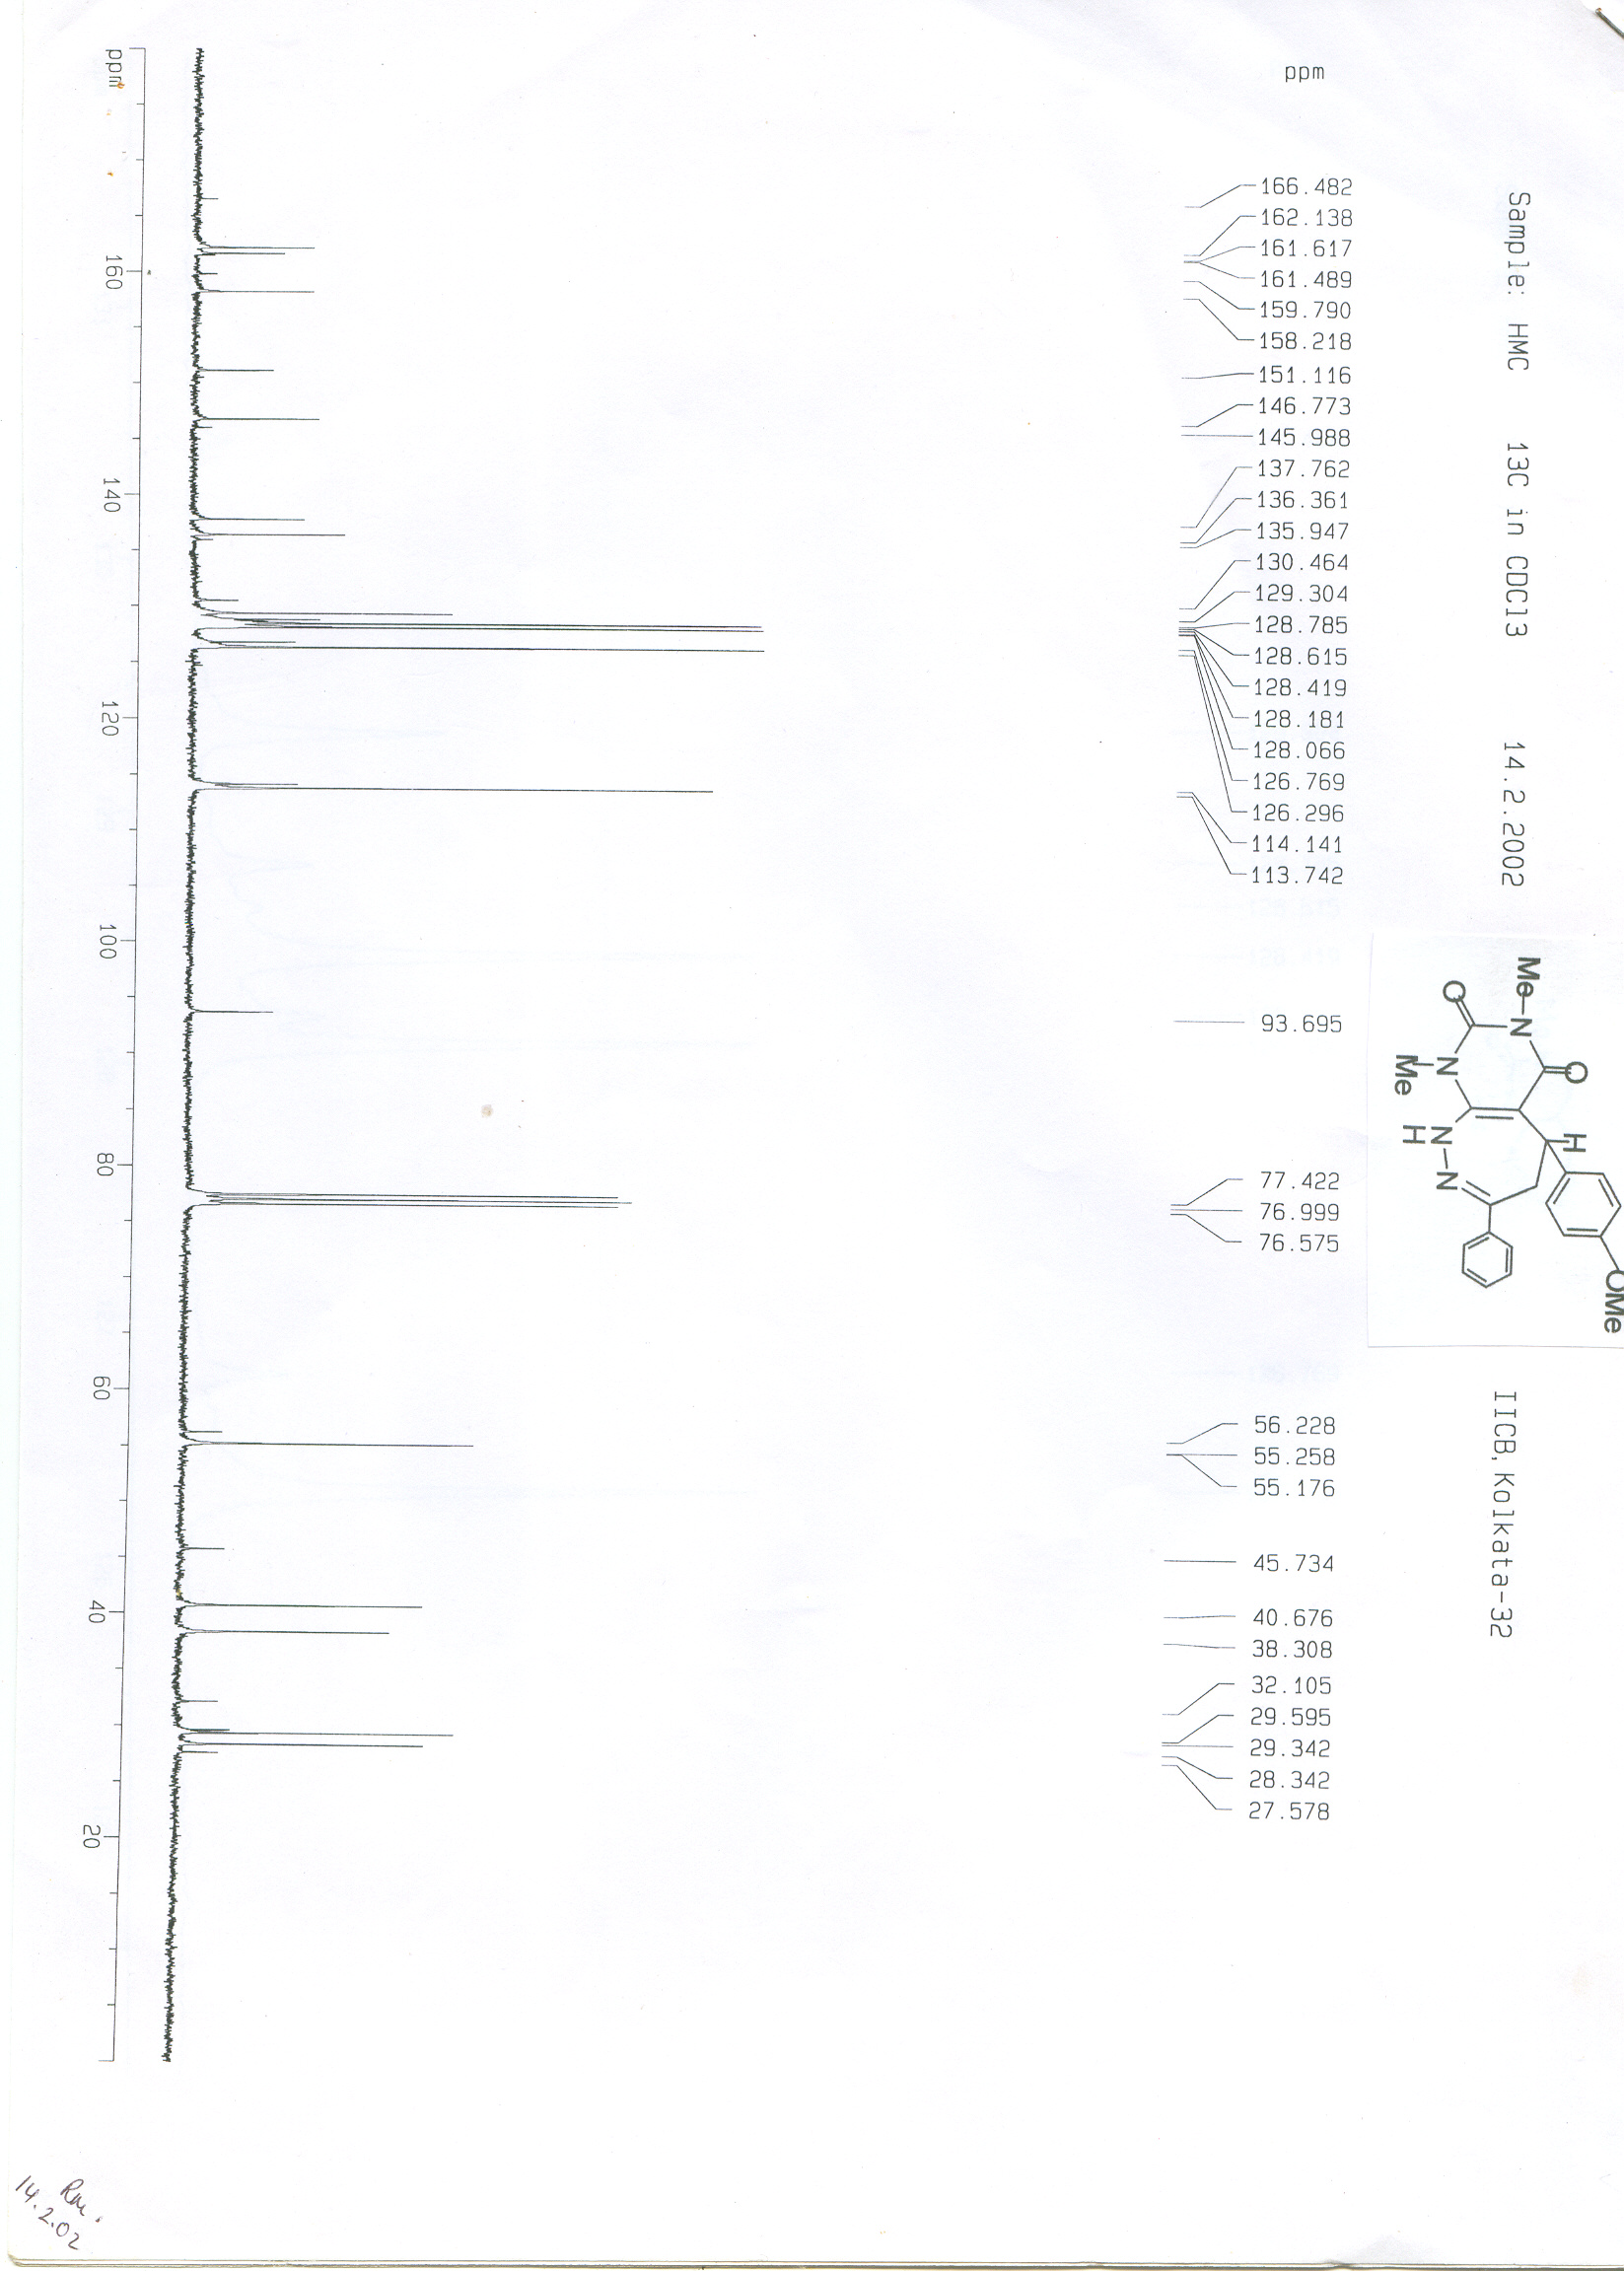

Supplement: Additional file 1 [file spectra 1.doc]

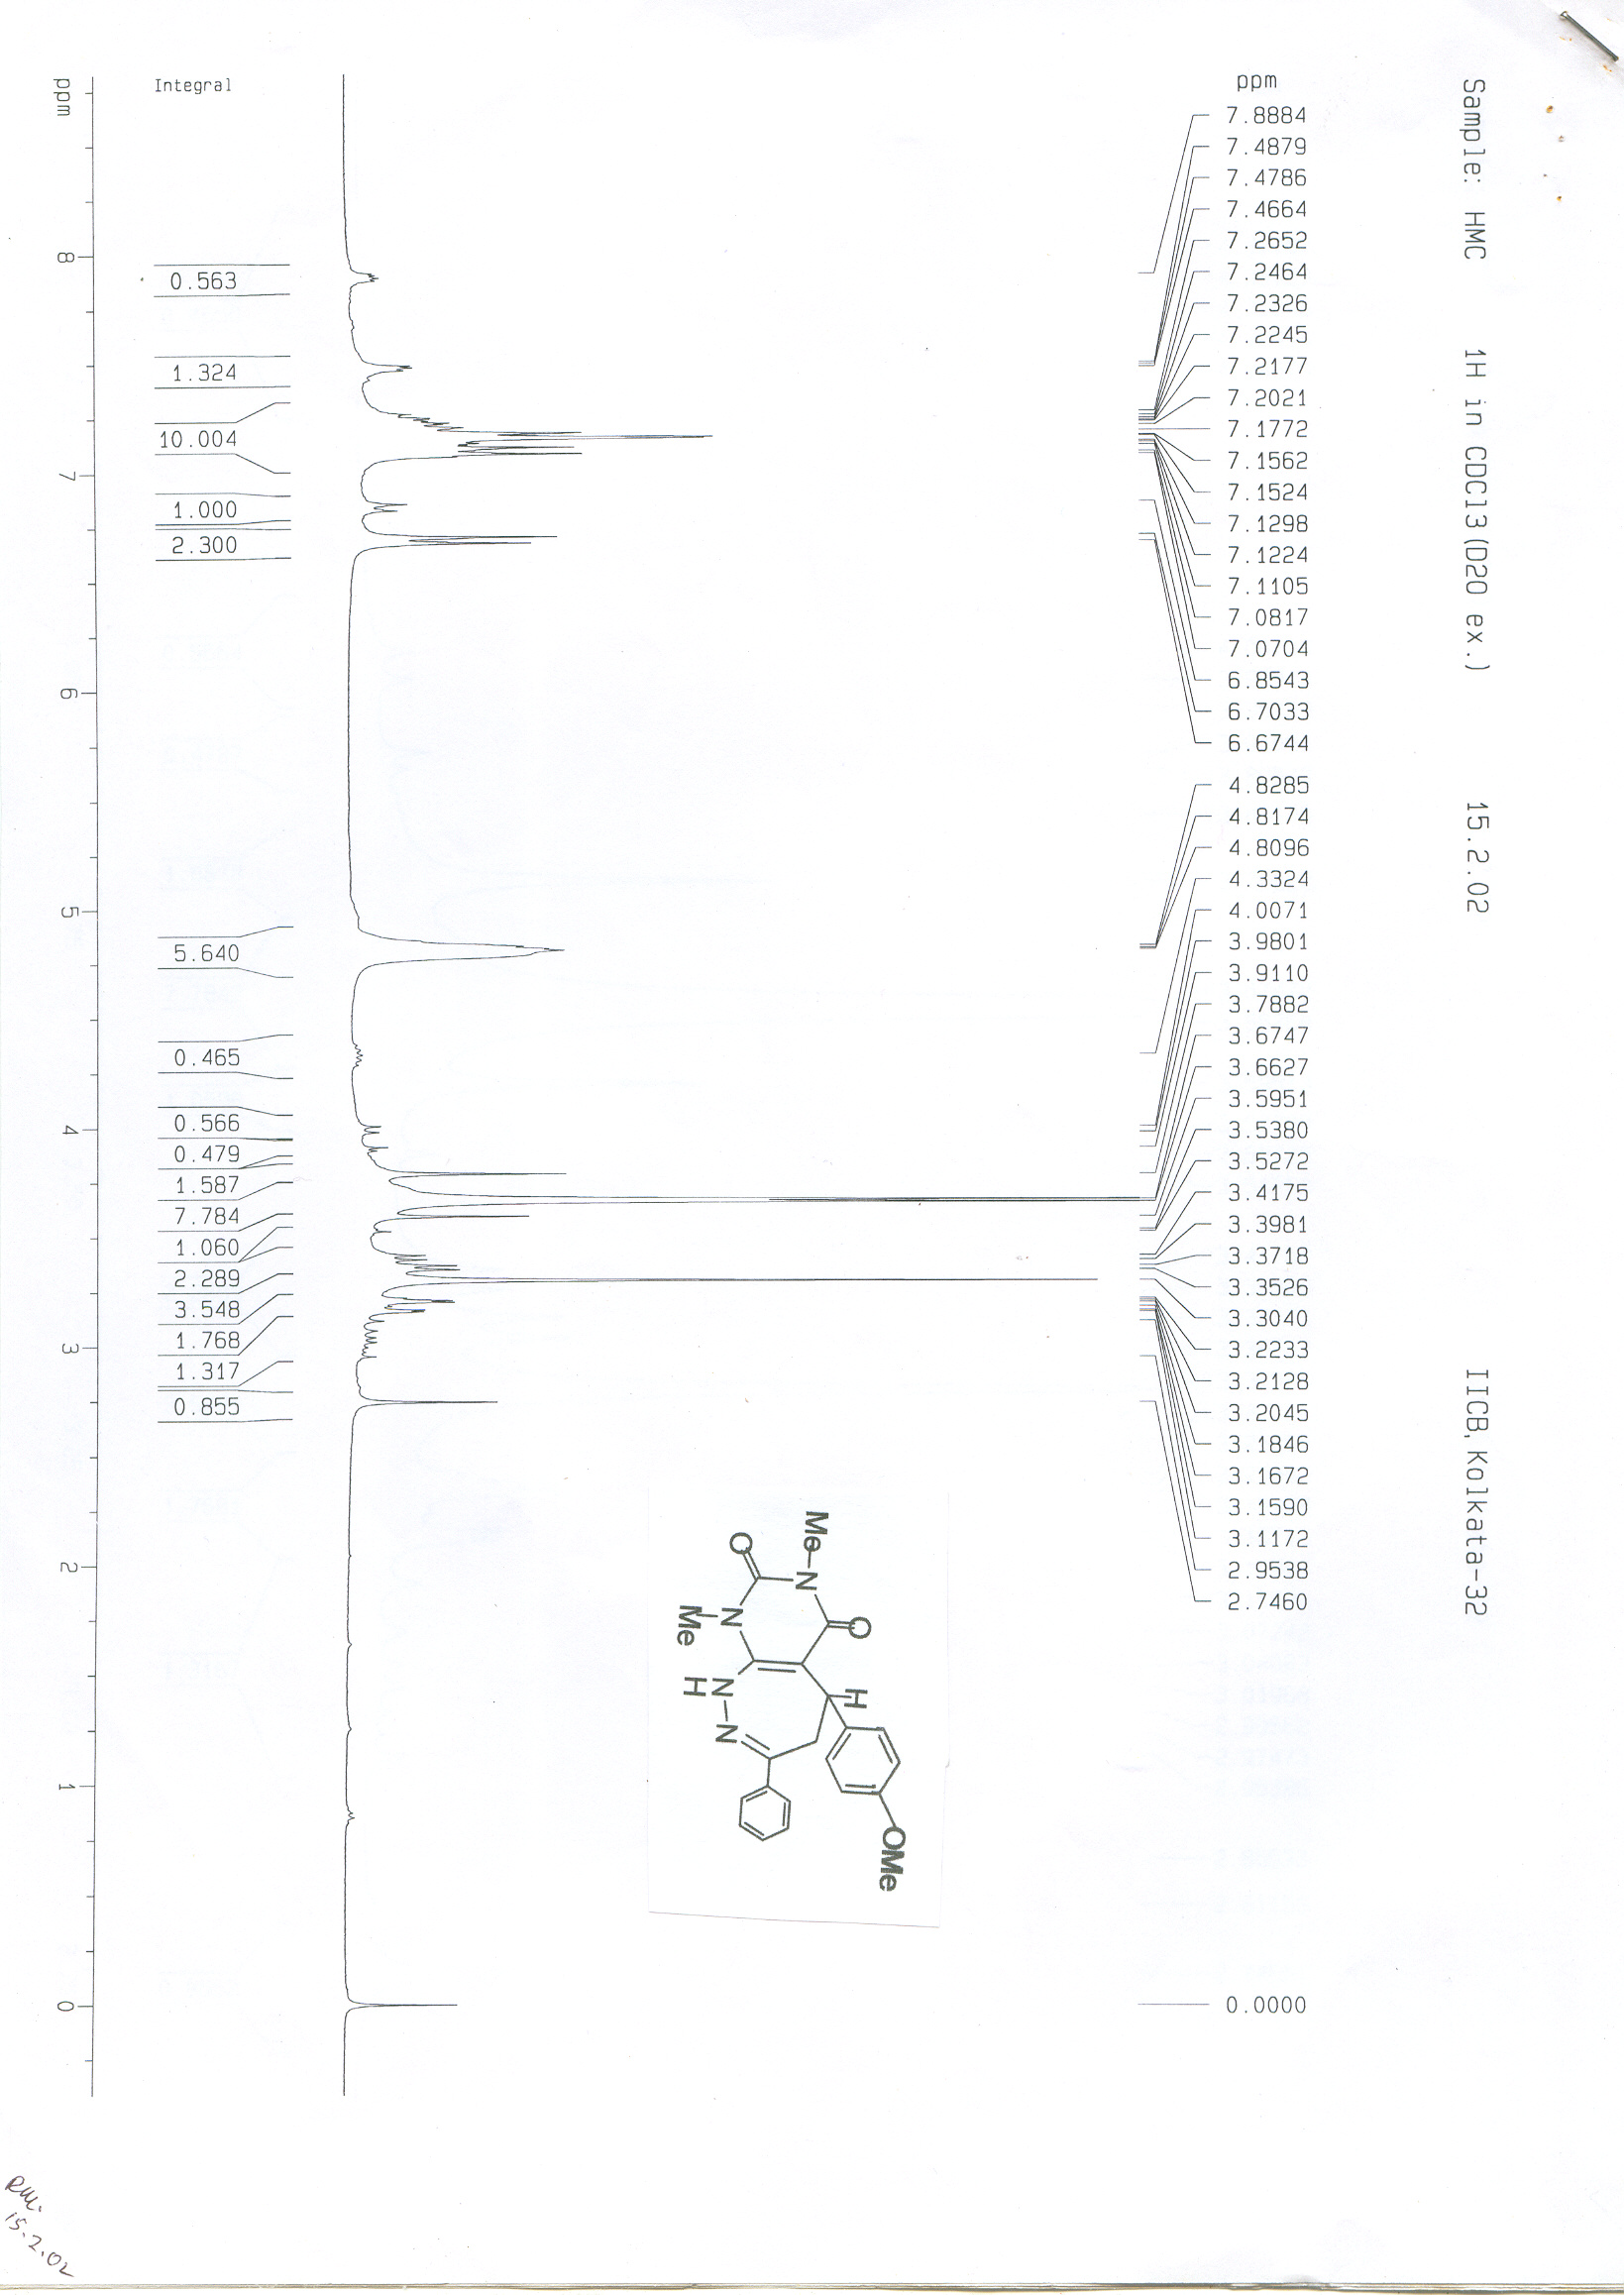

Supplement: Additional file 1 [file spectra7.doc]

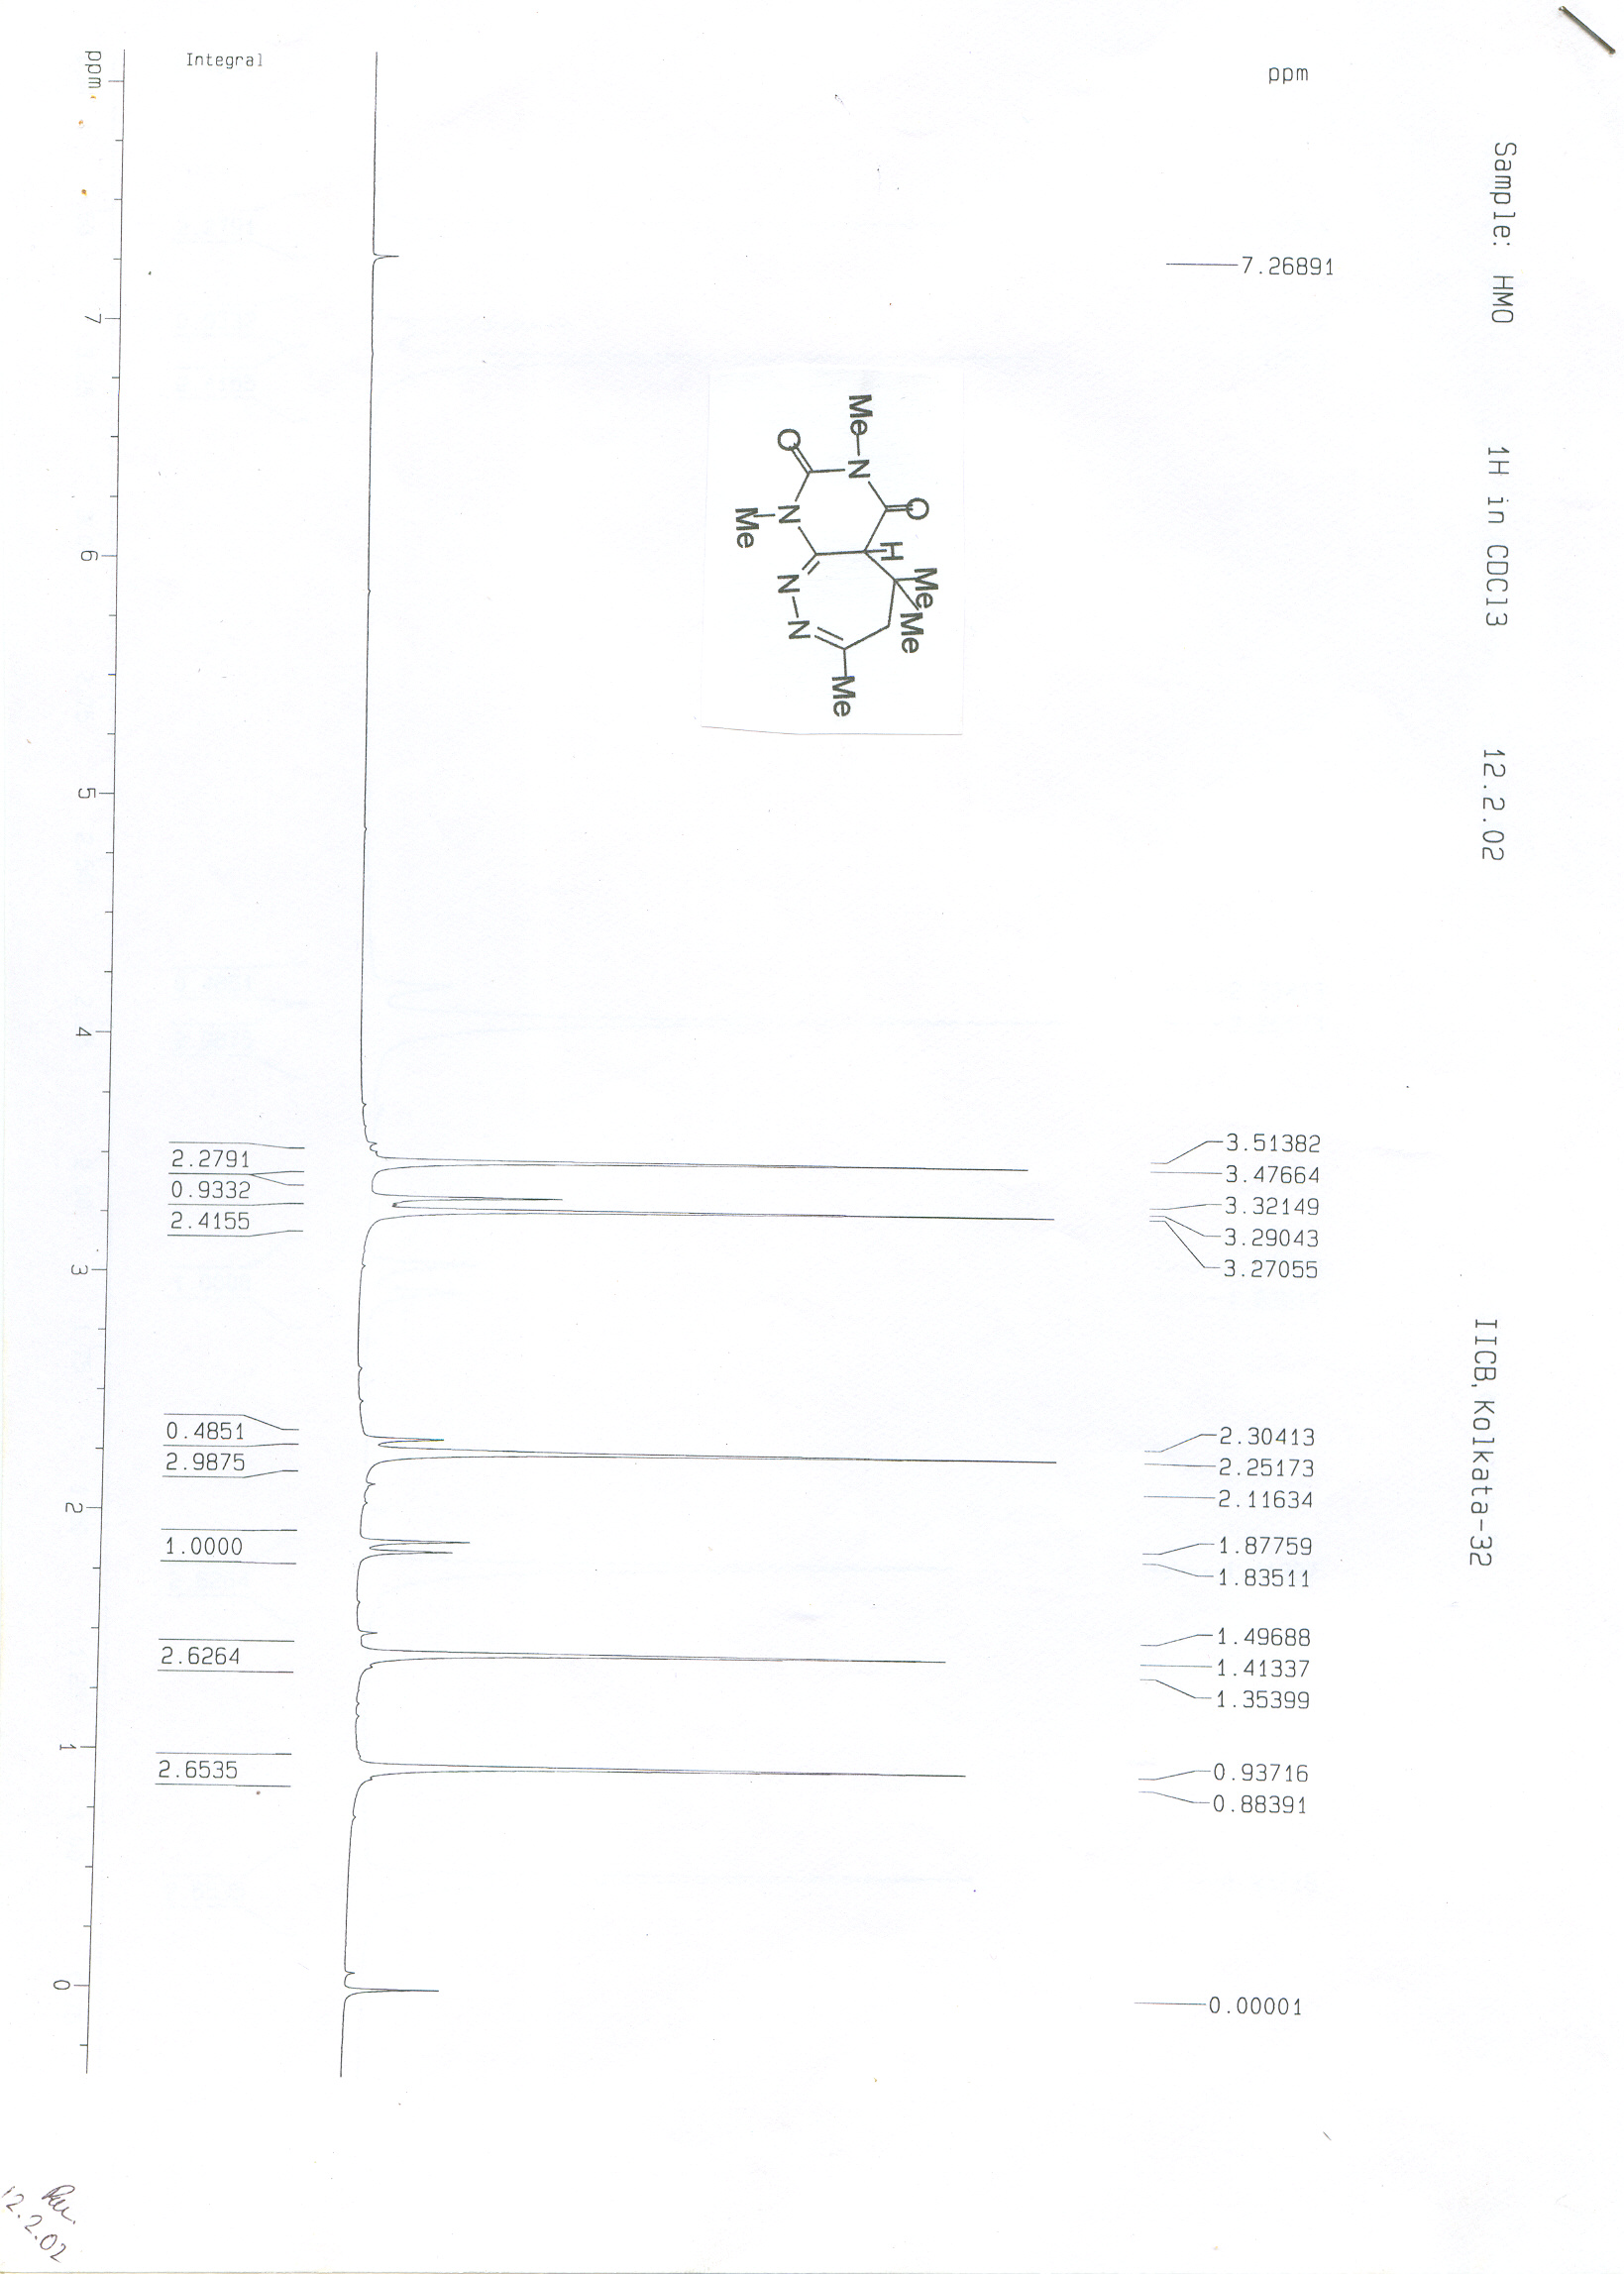

Supplement: Additional file 1 [file spectra8.doc]

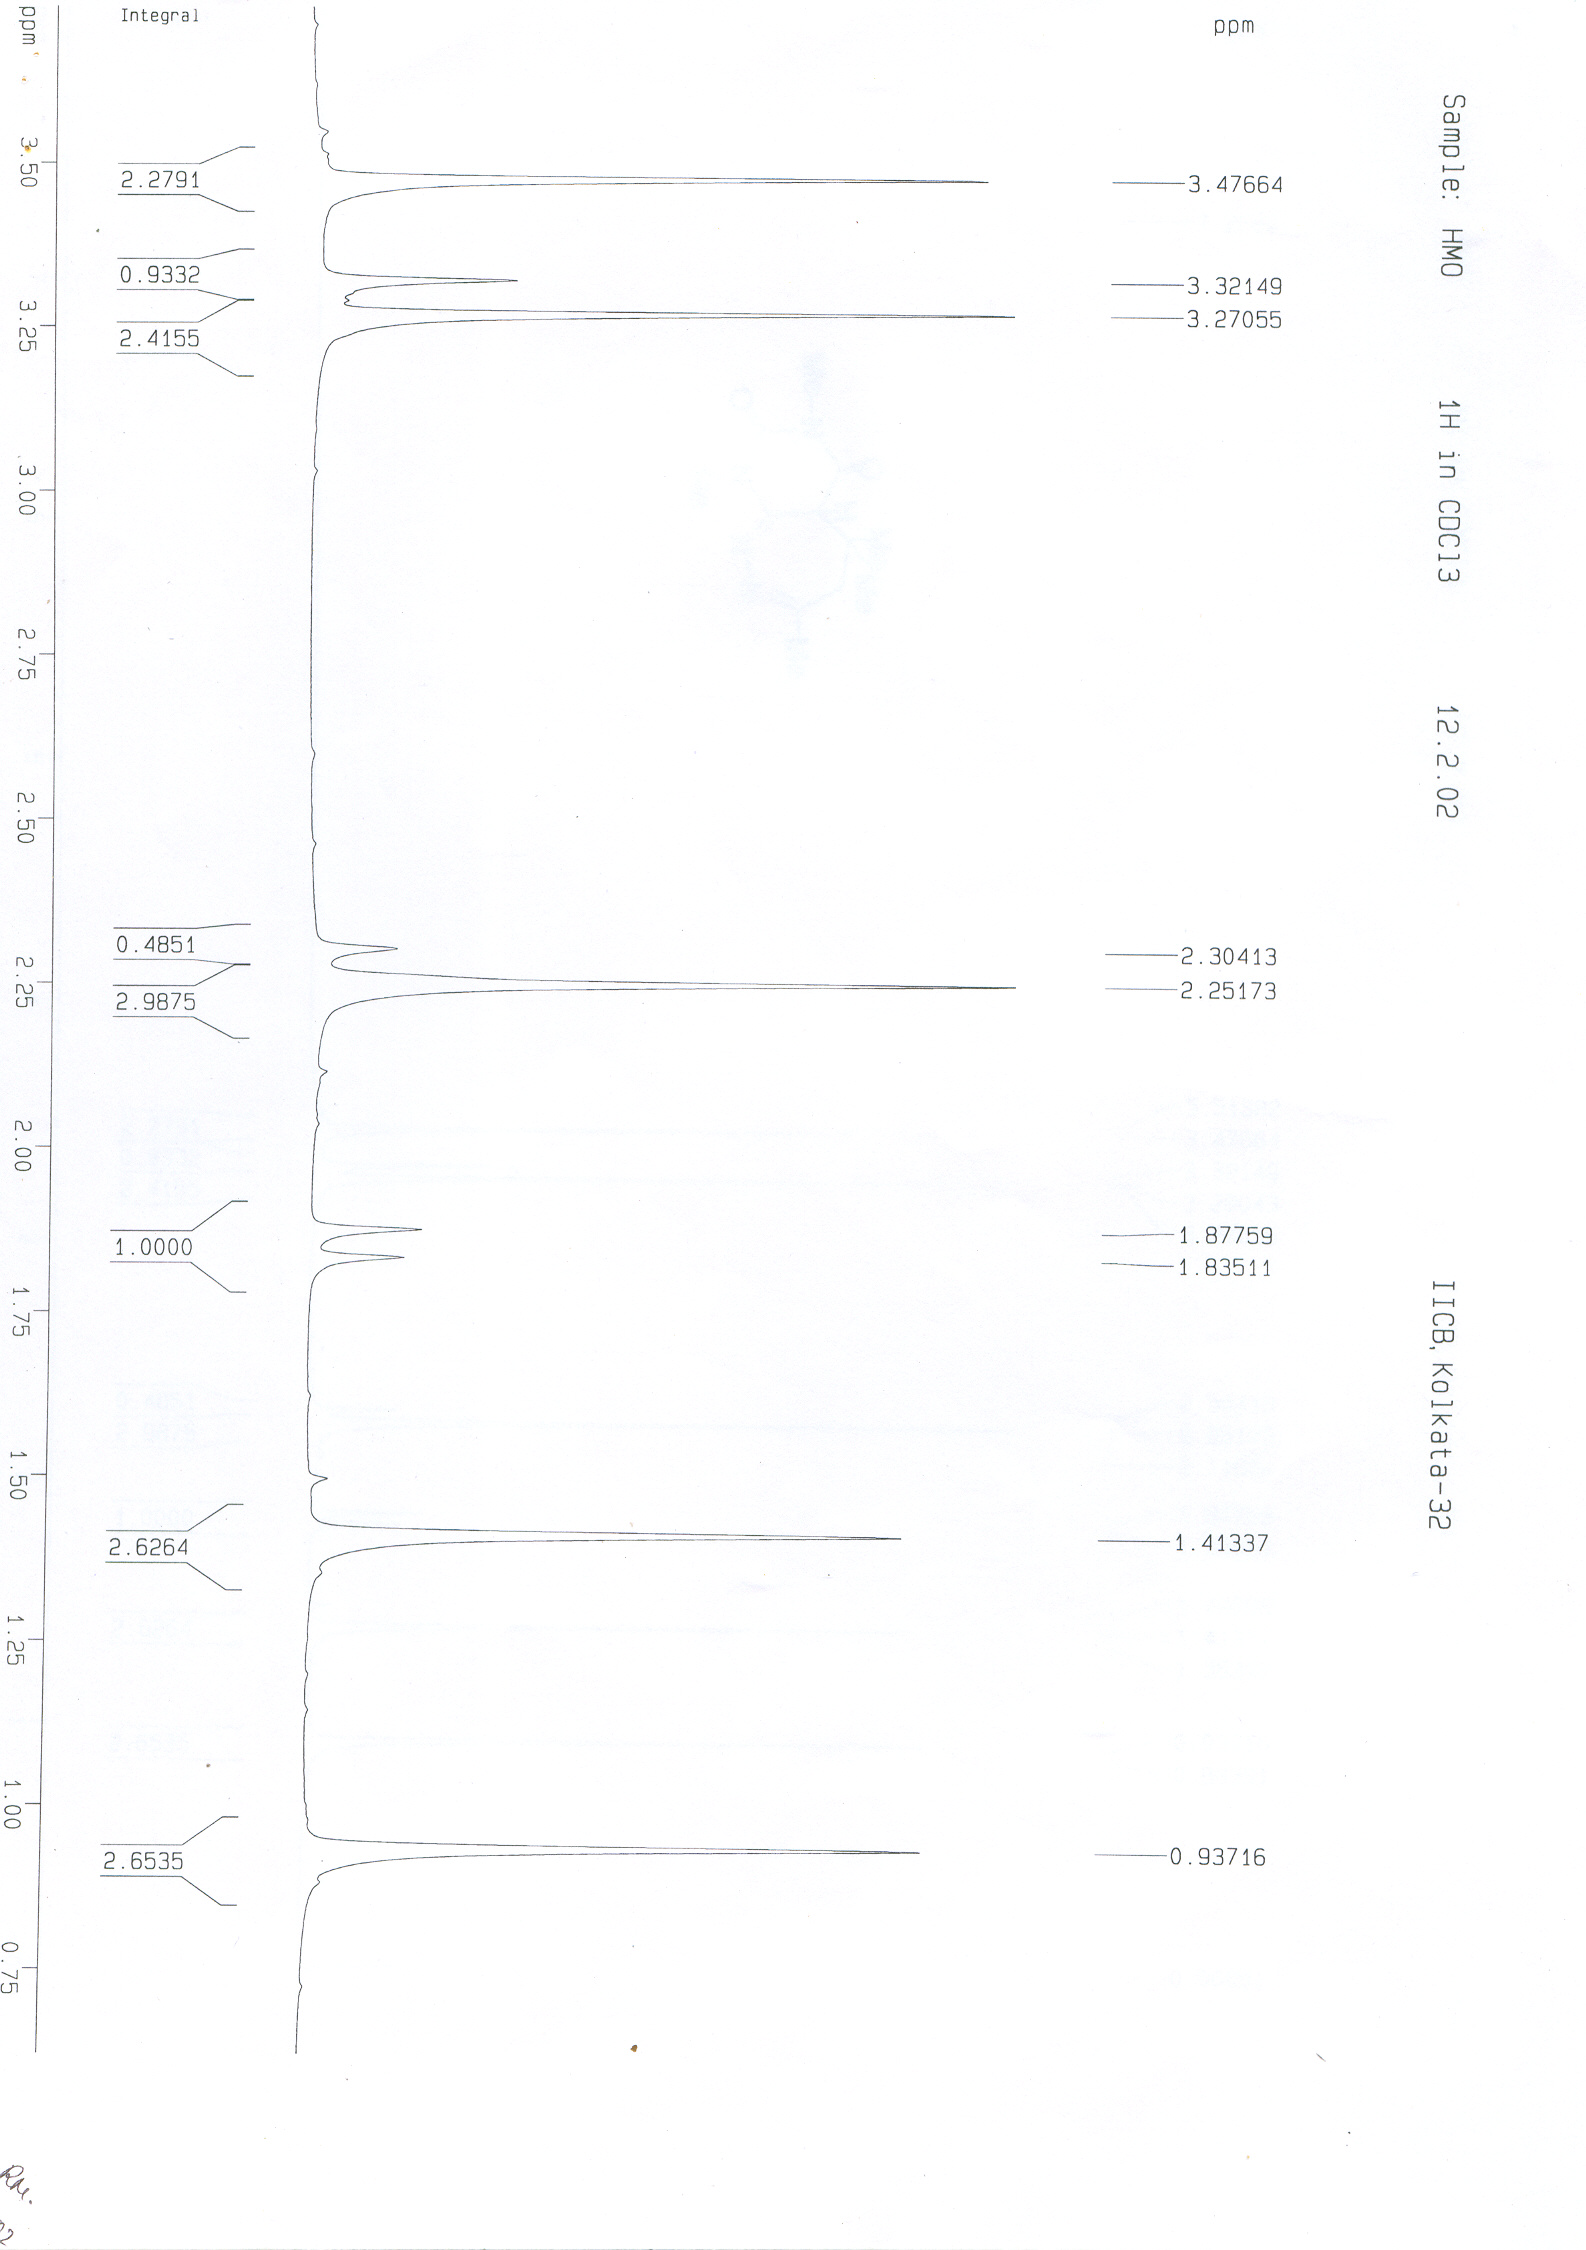

Supplement: Additional file 1 [file spectra9.doc]
